# Supplementary material
Source: publisher figshare collection journal article supplement (https://geolsoc.figshare.com/ndownloader/files/25790222)

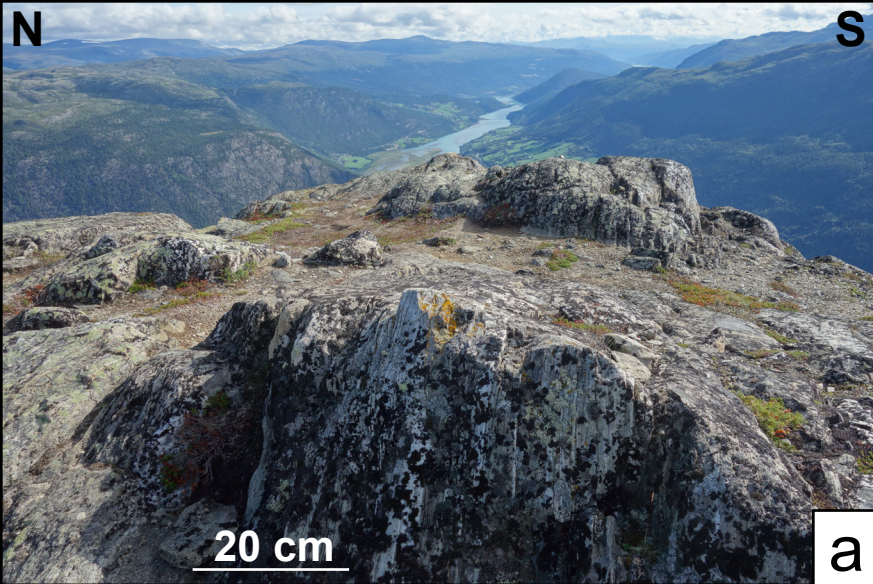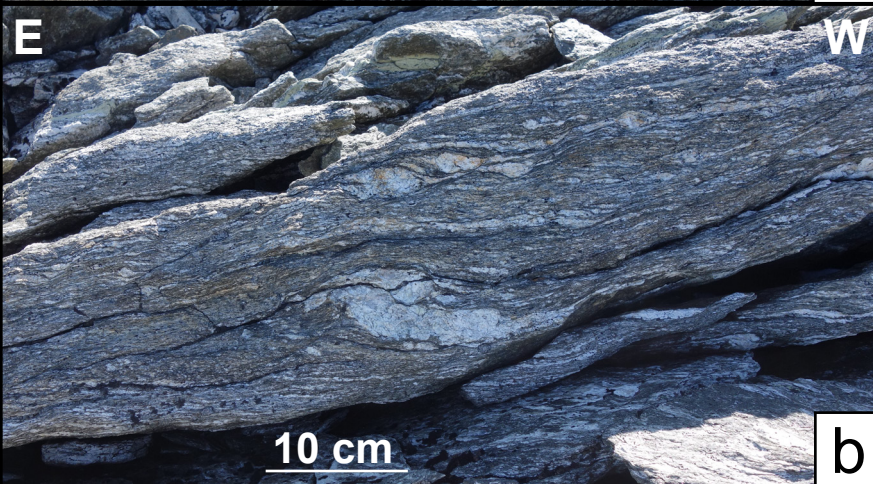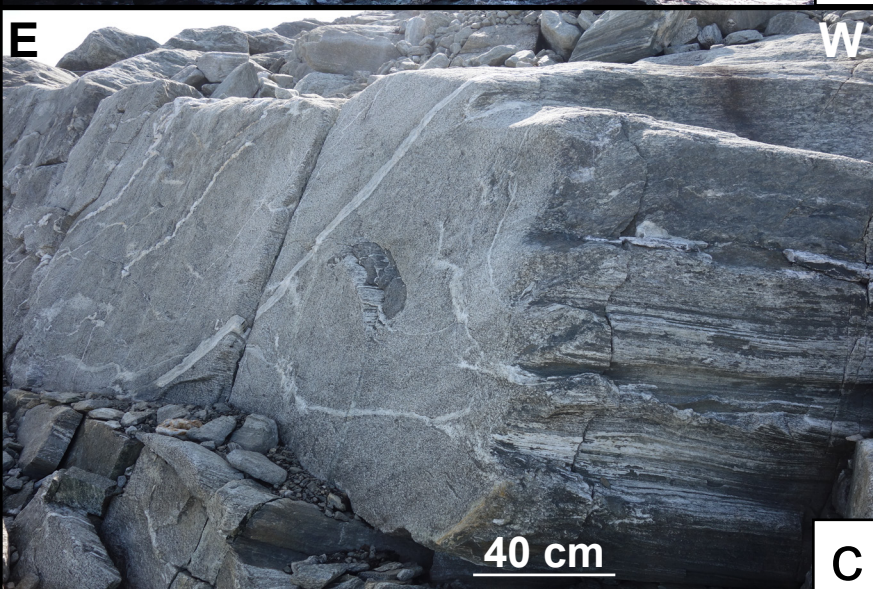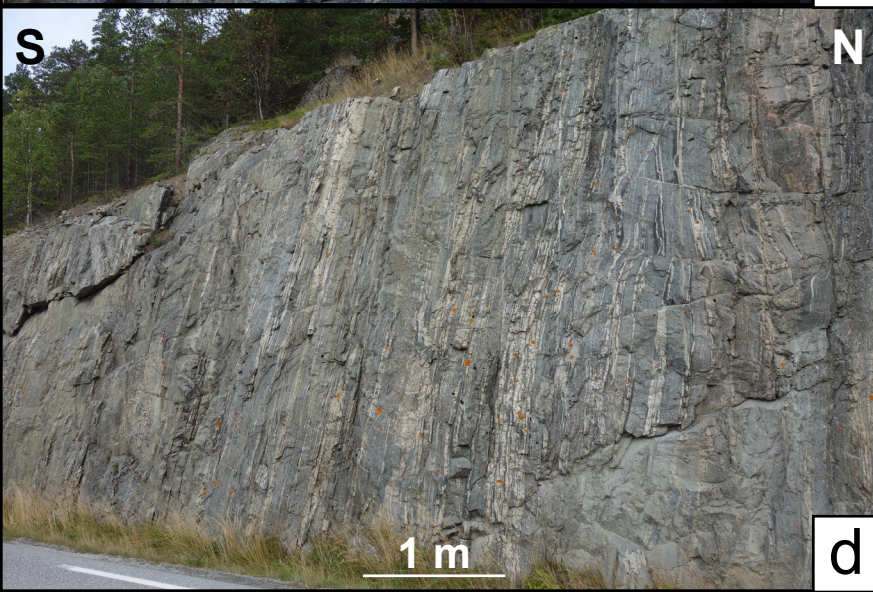

# Lom Shear Zone - Reconnaissance Mapping

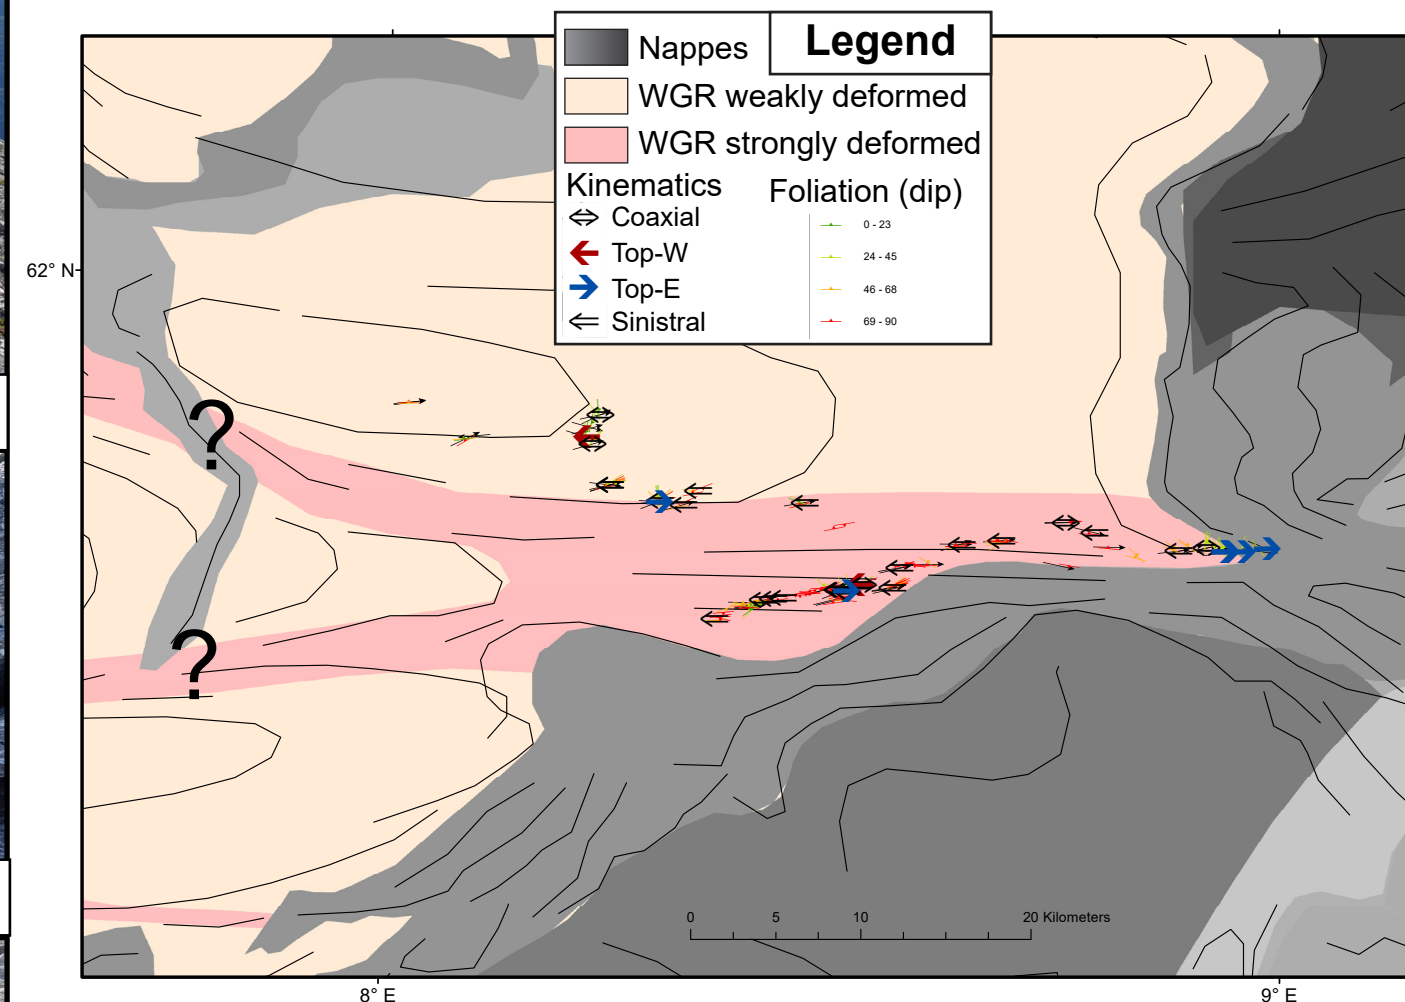

## Field Photos

a: Steep mylonitic foliations on Lomseggje (Eggjapiken). Outside of the picture, these are cut by a low-angle top-E shear zone. b: Steep mylonitic foliation with sinistral kinematic indicators. Storivilen. c: L-tectonite preserving magmatic textures in the lineation-perpendicular section. Veslivilen. d: Migmatite (right side) transformed into banded gneiss (left side). Tronoodden. e: S-C mylonite with sinistral fabrics and syn-kinematic quartz vein (top).

## Schematic Sketch

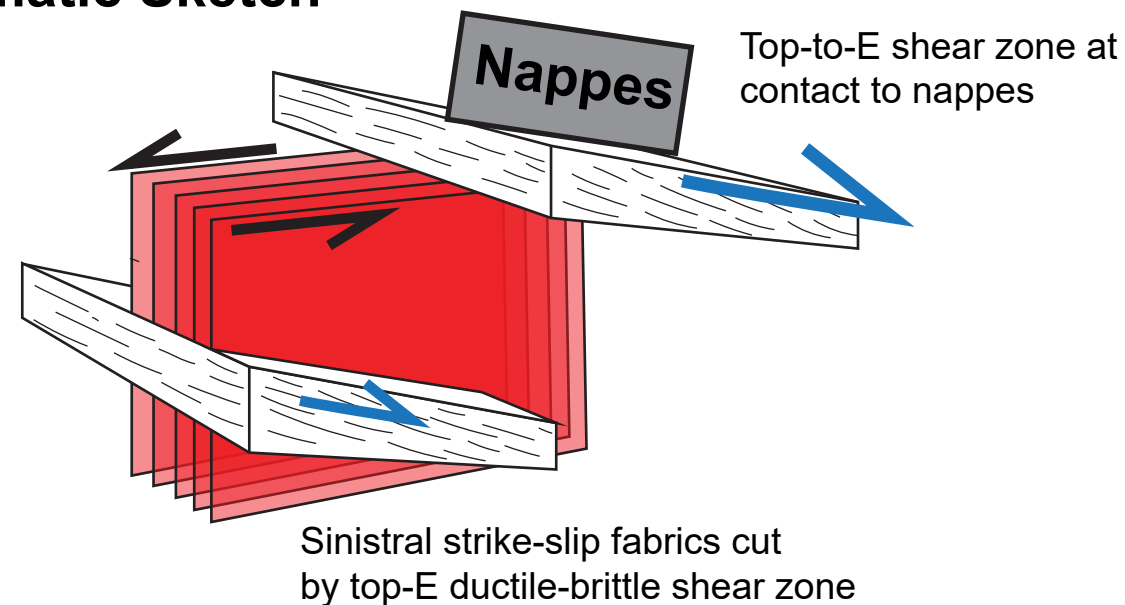

## Structural Data

■ Lineation (n = 69)  
● Foliation (n = 159)

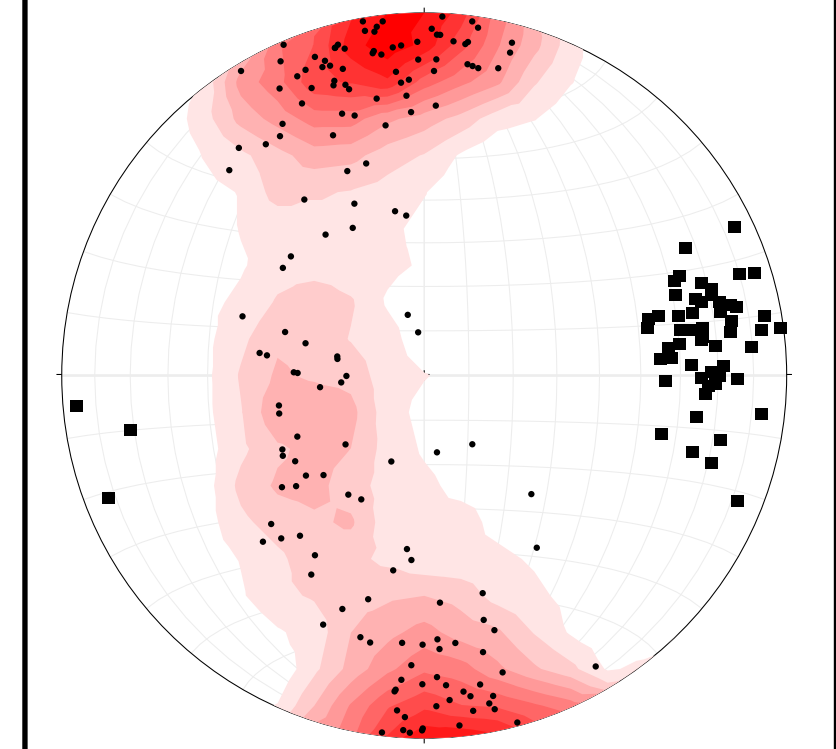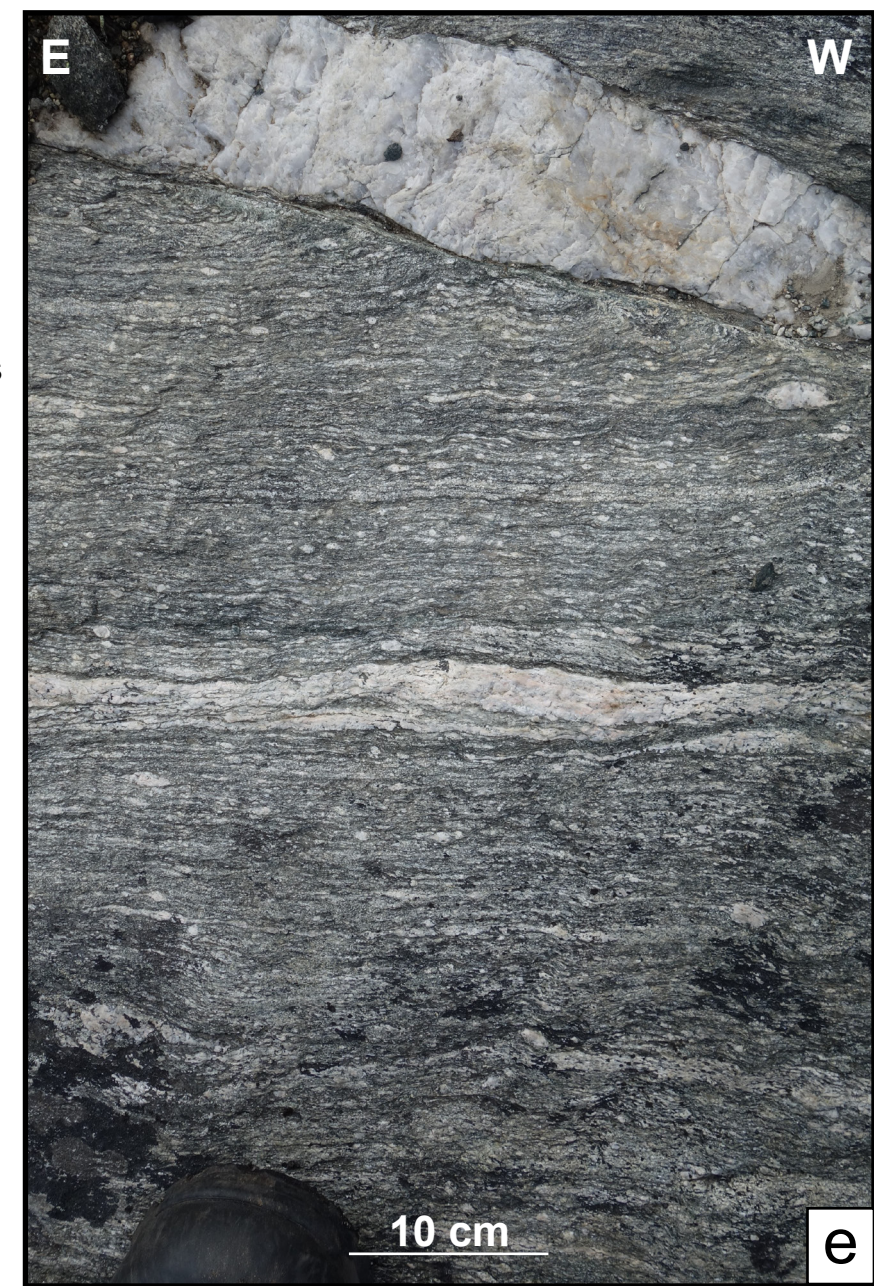

Supplement: Supplementary file 1 [file 25790222]
